# Supplementary material for: The synthesis and characterization of ytterbium-doped TiO2 hollow spheres with enhanced visible-light photocatalytic activity
Source: Royal Society of Chemistry journal article supplement (doi:10.1039/c7ra02165h), 2017-01-01
Supplement: c7ra02165h1.pdf [file c7ra02165h1.pdf]

## Supporting Information

### **Synthesis and characterization of ytterbium doped TiO<sub>2</sub> hollow spheres with enhanced visible-light photocatalytic activity**

Xueliang Jiang<sup>a,b</sup>, Chenjian Li<sup>b</sup>, Song Liu<sup>b</sup>, Fuqing Zhang<sup>b</sup>, Feng You<sup>a,b</sup>, Chu Yao<sup>a,b\*</sup>

a. Hubei Key Laboratory of Plasma Chemistry and Advanced Materials

b. College of Materials Science and Engineering, Wuhan Institute of Technology, Wuhan  
430205.China;

Corresponding author: [chuyao@wit.edu.cn](mailto:chuyao@wit.edu.cn) (C.Y.); Tel.: +86-27-8719-5661 (C.Y.)

## 1. Reaction device of photocatalytic evaluation

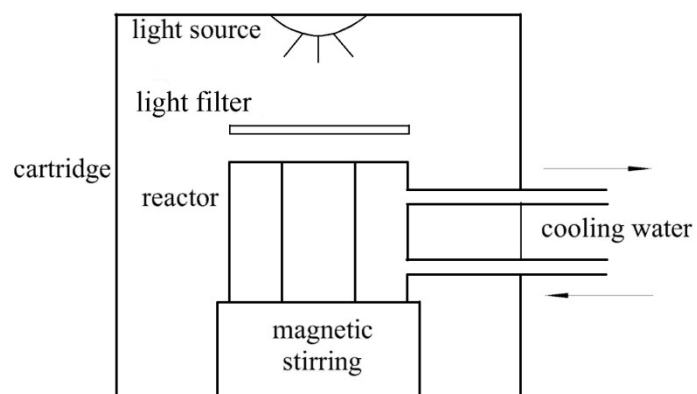

Fig. S1 Reaction device of photocatalytic evaluation

## 2. (101) diffraction peak of samples

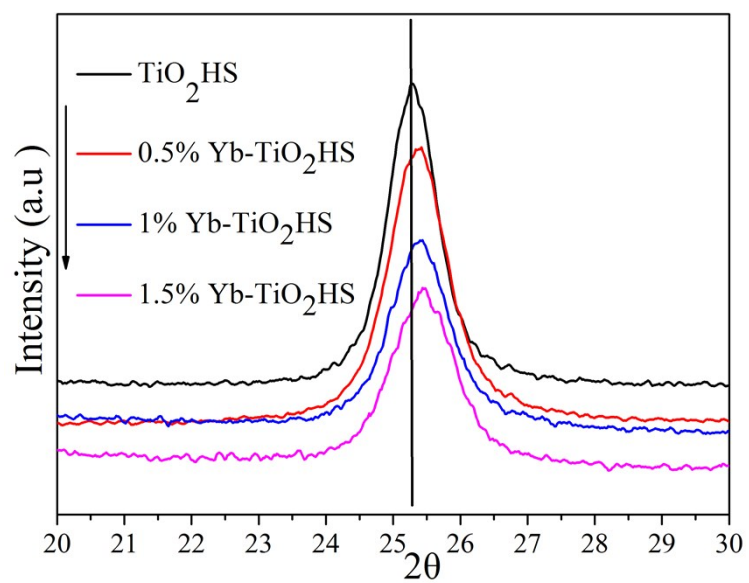

**Fig. S2. (101) diffraction peak of each samples**

### 3. Crystalline grain sizes of Yb-TiO<sub>2</sub>HS with difference Yb doped ratios

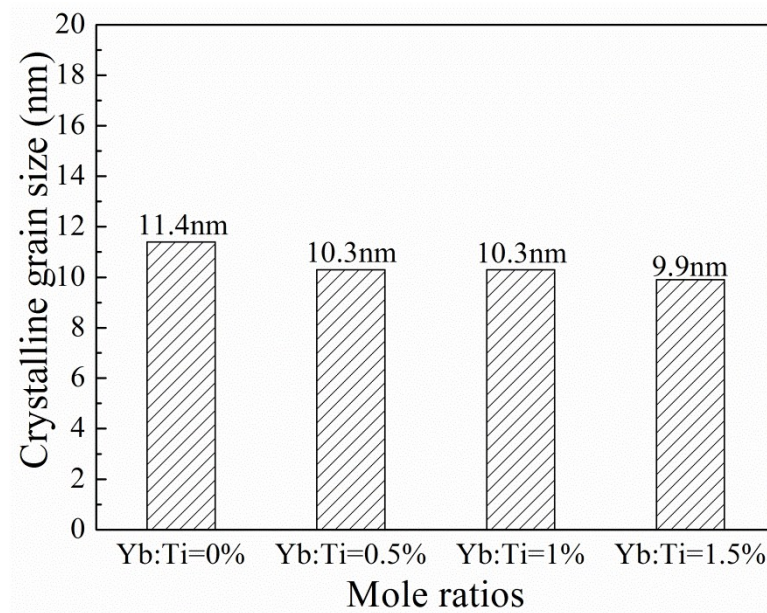

Fig. S3 Crystalline grain sizes of Yb-TiO<sub>2</sub>HS with difference Yb doped ratios

#### 4. FT-IR spectra of samples

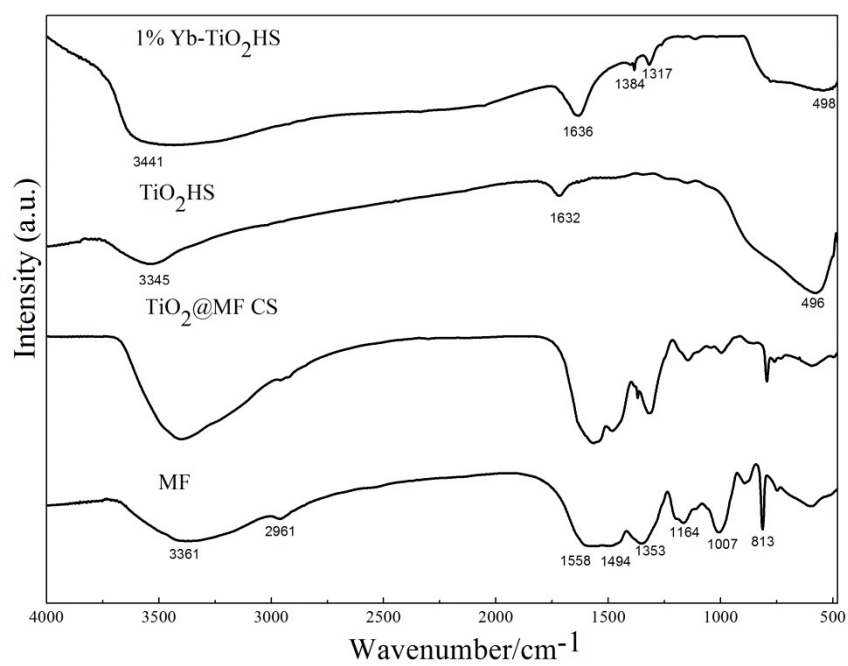

**Fig. S4** FT-IR spectra of samples

5. N<sub>2</sub> adsorption–desorption (a, b) and the pore size distribution (c, d) curves of samples

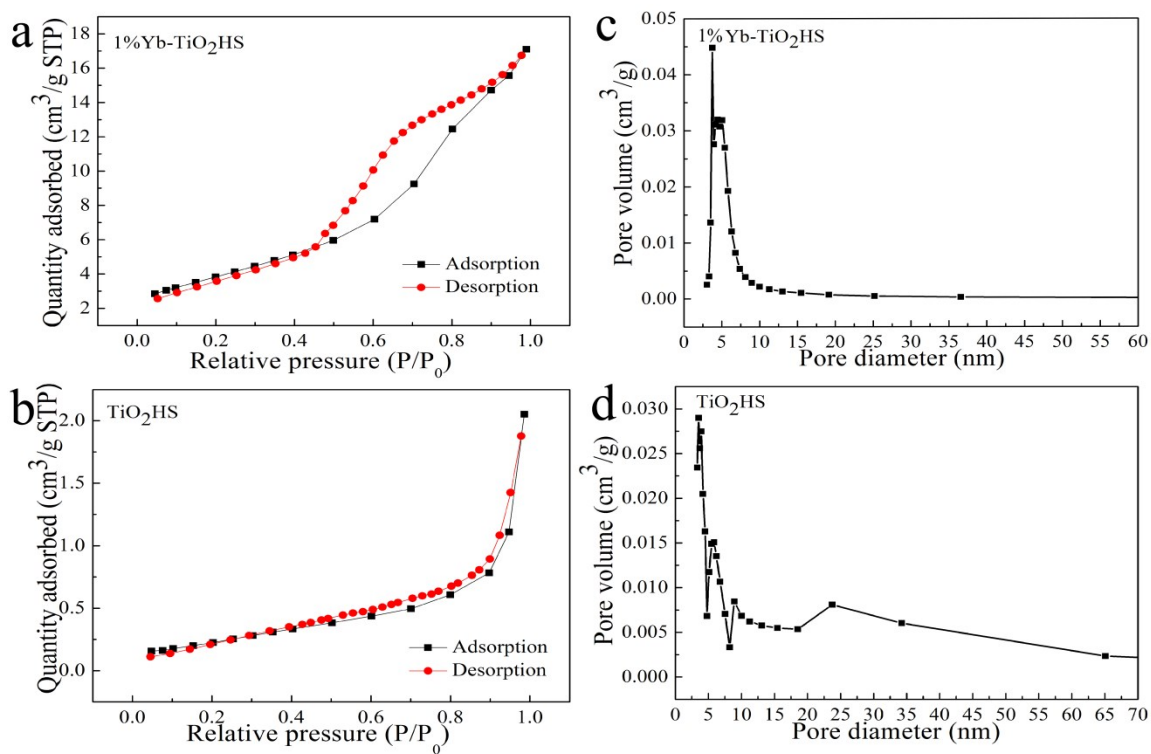

Fig. S5 N<sub>2</sub> adsorption–desorption (a, b) and the pore size distribution (c, d) curves of samples

## 6. UV-DRS spectra of samples

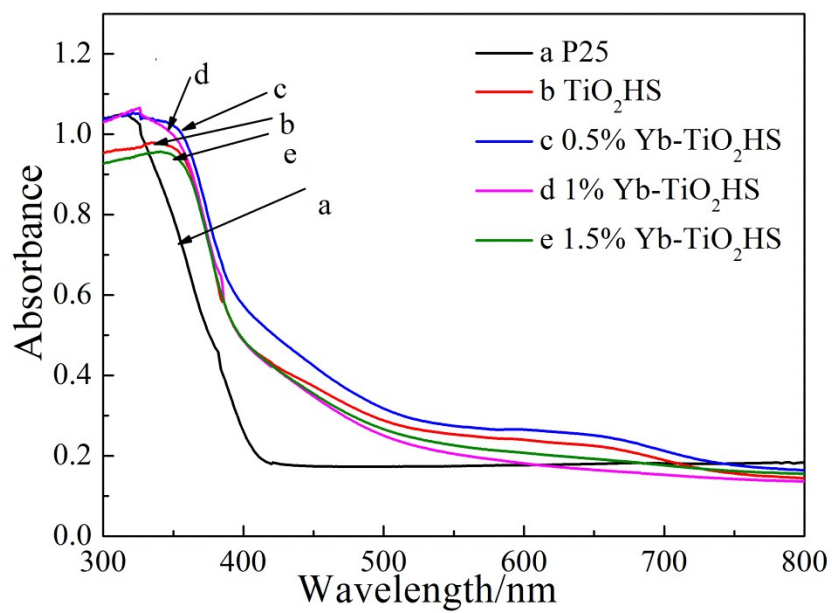

Fig. S6 UV-DRS spectra of samples

## 7. K-M function transformed spectra of samples

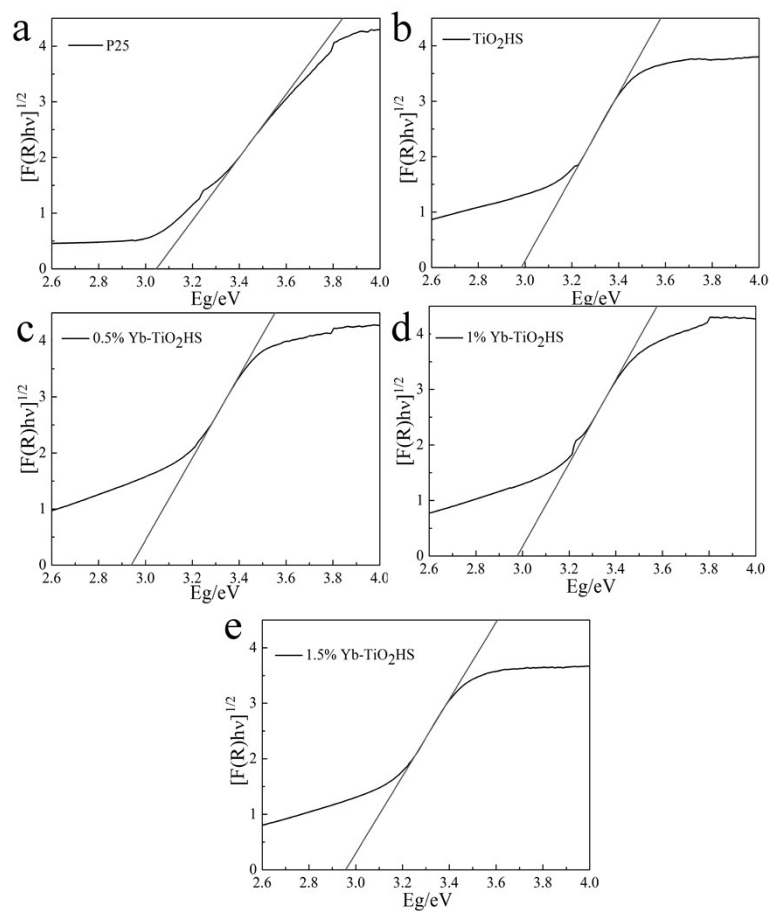

Fig. S7. K-M function transformed spectra of each samples are calculated by Kubelka–Munk

Function (K-M Function) method.



## 8. Luminescence spectra of samples

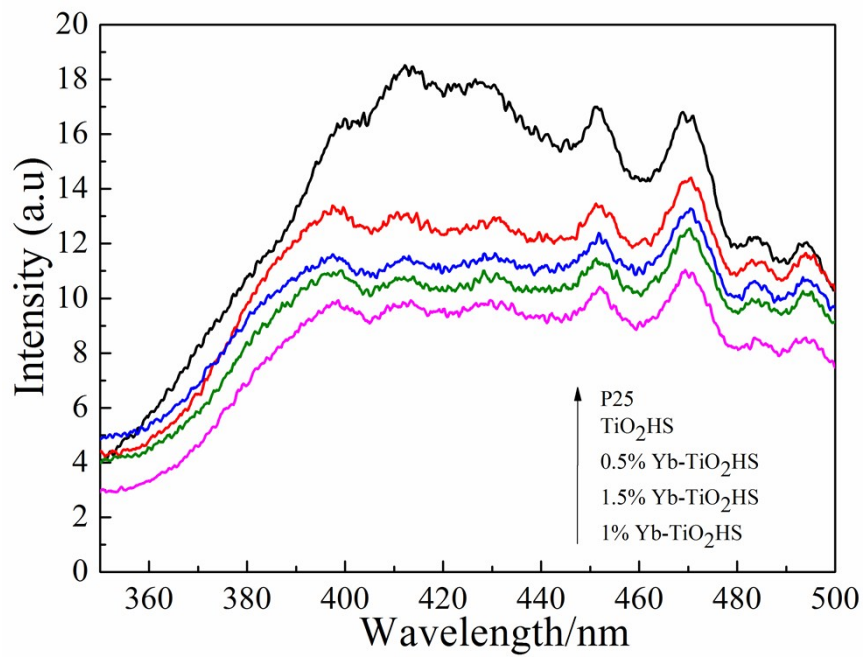

**Fig. S8 Luminescence spectra of samples**

### 9. Cycles of the photocatalytic activity of MO in the presence of 1%Yb-TiO<sub>2</sub>HS

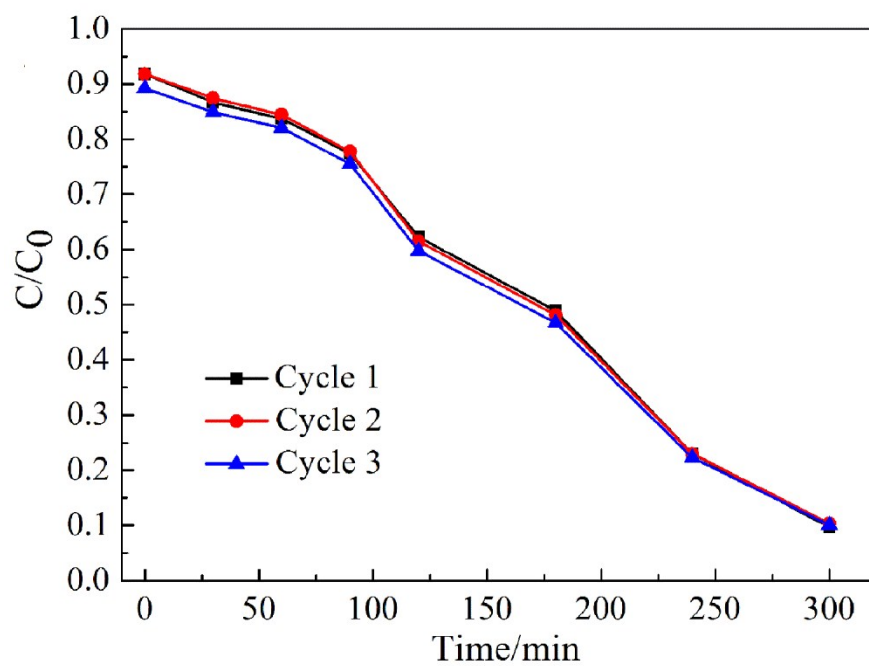

Fig. S9 Cycles of the photocatalytic activity of MO in the presence of 1%Yb-TiO<sub>2</sub>HS
